# Supplementary material for: Combination of mometasone furoate and oxymetazoline for the treatment of adenoid hypertrophy concomitant with allergic rhinitis: A randomized controlled trial
Source: PubMed Central journal article supplement (PMC5241667; doi:10.1038/srep40425), 2017-01-18
Supplement: srep40425-s1.pdf [file srep40425-s1.pdf]

**Combination of mometasone furoate and oxymetazoline for the treatment of adenoid hypertrophy concomitant with allergic rhinitis:  
A randomized controlled trial**

Wenlong Liu\*, PhD, Lifeng Zhou, MD, Qingxiang Zeng, PhD, Renzhong Luo, MD

From Department of Otolaryngology, Guangzhou Women and Children's Medical Center,  
Guangzhou Medical University, Guangzhou, China

Reprint requests: Wenlong Liu, PhD, Department of Otolaryngology, Guangzhou Women and  
Children's Medical Center, Guangzhou Medical University, No 9. Jinsui Road, Guangzhou,  
China, 510623. Email: lw120103@163.com, Phone: 00862038076166, Fax: 00862038076166.

Figure legends

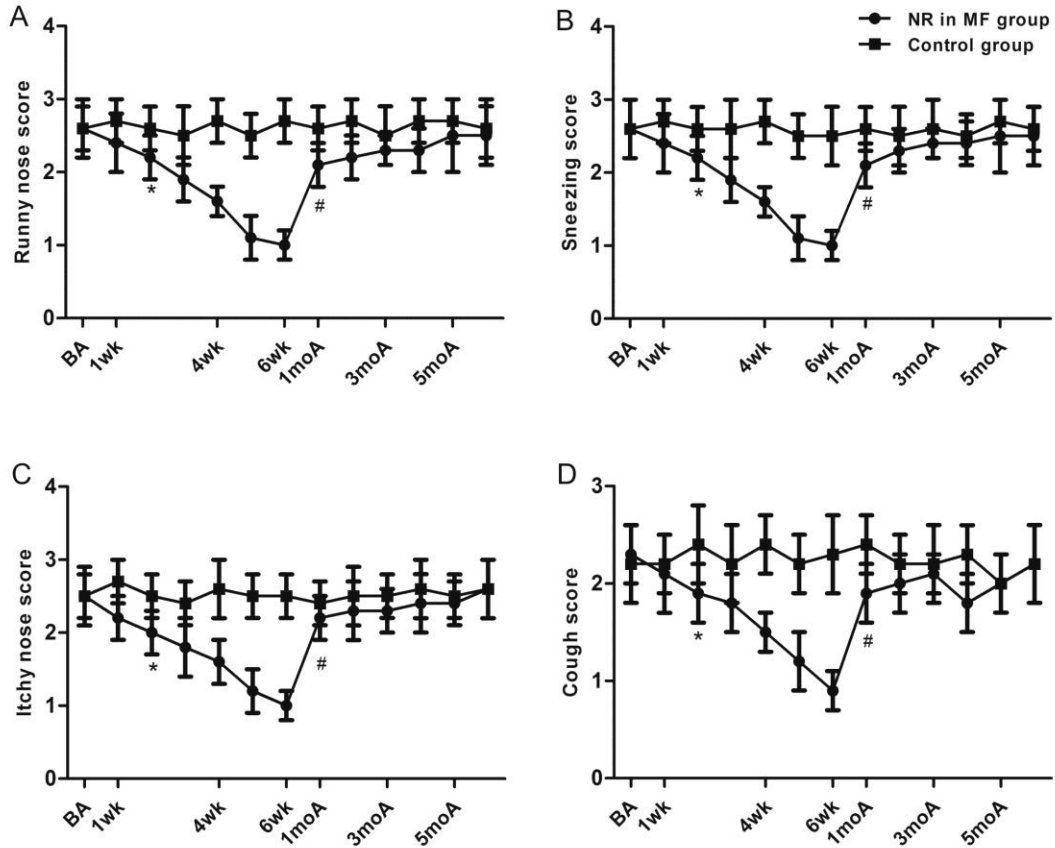

FIG. E1. Individual symptom scores of different time points between non-responders and control during the first treatment stage. A for runny nose score, B for sneezing score, C for itchy nose score and D for cough score. \* Compared with baseline score,  $P < 0.05$ . #  $P < 0.05$  versus the lowest score during treatment.

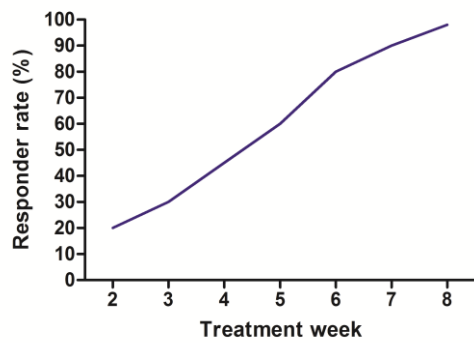

FIG. E2. Responder rate during different treatment weeks.

Table E1 Disposition of subjects and the reasons for discontinuation

| Disposition summary        | Stage 1  |           |            | Stage 2 |             |                 |
|----------------------------|----------|-----------|------------|---------|-------------|-----------------|
|                            | MF       | Placebo   | MF+Placebo | MF+OXY  | Placebo+OXY | Placebo+Placebo |
| Screened subjects, no      | 120      | 120       | 17         | 17      | 17          | 17              |
| Completed subjects, no     | 112      | 109       | 15         | 16      | 16          | 16              |
| Discontinued subjects no   | 8        | 11        | 2          | 1       | 1           | 1               |
| Reason for discontinuation |          |           |            |         |             |                 |
| Adverse event              | 1        | 1         | 0          | 0       | 1           | 0               |
| Abnormal test result(s)    | 0        | 1         | 0          | 0       | 0           | 0               |
| Treatment failure          | 0        | 0         | 0          | 0       | 0           | 0               |
| Protocol violation         | 0        | 3         | 0          | 0       | 0           | 0               |
| Noncompliance              | 2        | 2         | 1          | 0       | 0           | 0               |
| Consent withdrawn          | 3        | 2         | 0          | 0       | 0           | 1               |
| Lost to follow-up          | 2        | 2         | 1          | 1       | 0           | 0               |
| Safety population, no. (%) | 110 (99) | 109 (100) | 17 (100)   | 16 (95) | 17 (100)    | 17 (100)        |
| ITT population, no. (%)    | 111 (99) | 109 (100) | 17 (100)   | 16 (95) | 17 (100)    | 17 (100)        |

ITT, Intent-to-treat.

\*Safety population includes all randomized subjects who took at least 1 dose of the study drug.

#Intent-to-treat population includes all subjects who were randomized and had at least 1 postbaseline efficacy observation.

Table E2 Overview of treatment-related adverse events

|                   | Stage 1 |         |            | Stage 2 |             |                 |
|-------------------|---------|---------|------------|---------|-------------|-----------------|
|                   | MF      | Placebo | MF+Placebo | MF+OXY  | Placebo+OXY | Placebo+Placebo |
| Number            | 110     | 109     | 15         | 16      | 16          | 16              |
| Any adverse event | 9       | 8       | 2          | 1       | 2           | 2               |
| Dysgeusia         | 2       | 0       | 0          | 0       | 0           | 1               |
| Epistaxis         | 2       | 2       | 1          | 0       | 0           | 0               |
| Headache          | 1       | 1       | 0          | 1       | 1           | 1               |
| Nasal discomfort  | 0       | 1       | 0          | 0       | 1           | 0               |
| Nausea            | 1       | 2       | 1          | 0       | 0           | 0               |
| Sneezing          | 2       | 1       | 0          | 0       | 0           | 0               |
| Mucosal erosion   | 0       | 1       | 0          | 0       | 0           | 0               |
| Somnolence        | 1       | 0       | 0          | 0       | 0           | 0               |
